# Supplementary material
Source: Springer Nature journal article supplement (https://www.springermedizin.de/resource/supplementary/12985_2010_946_MOESM2_ESM.pdf/9608802)

### High-risk HPV

### Low-risk HPV

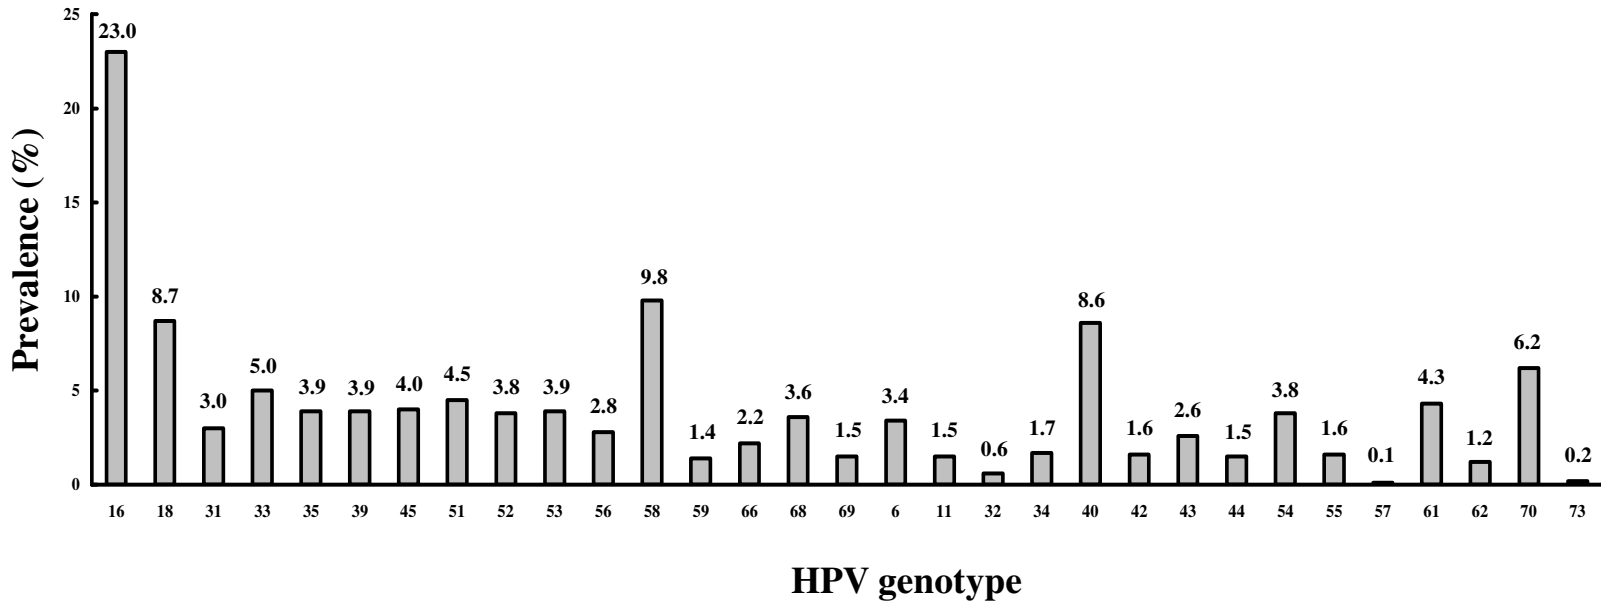

Supplement: MOESM2 [file 9608802]
